# Supplementary material for: A novel 9H-indeno[1,2-b]pyrazine-2,3-dicarbonitrile end group for an efficient non-fullerene small molecule acceptor
Source: Royal Society of Chemistry journal article supplement (doi:10.1039/c9tc01214a), 2019-01-01
Supplement: c9tc01214a1.pdf [file c9tc01214a1.pdf]

## Electronic Supplementary Information

### A novel 9*H*-indeno[1,2-*b*]pyrazine-2,3-dicarbonitrile end group for efficient non-fullerene small molecule acceptor

Wei Gao,<sup>ab</sup> Miao Zhang,<sup>c</sup> Zhanxiang Chen,<sup>a</sup> Xiaohui Liu,<sup>b</sup> Kailu Zheng,<sup>a</sup> Cheng Zhong,<sup>a</sup> Fujun Zhang\*<sup>c</sup> and Chuluo Yang\*<sup>ab</sup>

<sup>a</sup>Department of Chemistry and Hubei Key Lab on Organic and Polymeric Optoelectronic Materials, Wuhan University, Wuhan, 430072, People's Republic of China

E-mail: [clyang@whu.edu.cn](mailto:clyang@whu.edu.cn)

<sup>b</sup>Shenzhen Key Laboratory of Polymer Science and Technology, College of Materials Science and Engineering, Shenzhen University, Shenzhen 518060, China

<sup>c</sup>Key Laboratory of Luminescence and Optical Information, Ministry of Education, Beijing Jiao tong University, Beijing, 100044, People's Republic of China

E-mail: [fjzhang@bjtu.edu.cn](mailto:fjzhang@bjtu.edu.cn)

### General Information

All solvents and reagents were used as received from commercial sources and used without further purification. 1*H*-indene-1,2(3*H*)-dione (compound **1**), 2,3-diaminomaleonitrile (compound **2**), INIC and polymer donor PBDB-T were purchased from commercial sources. <sup>1</sup>H NMR and <sup>13</sup>C NMR spectra were recorded on a Bruker Advanced II (400 MHz) spectrometer. The high resolution mass spectra (HRMS) and matrix-assisted laser desorption/ionization time of flight mass spectrometry (MALDI-TOF-MS) were performed on Thermo Scientific LTQ Orbitrap XI using ESI and 5800 MALDI-TOF/TOF mass spectrometry (AB SCIEX, USA) in positive mode, respectively. UV-vis spectra were measured using a Shimadzu UV-2500 recording spectrophotometer. Cyclic voltammetry (CV) measurements of targeted SMA thin films were conducted on a CHI voltammetric analyzer in acetonitrile solution with 0.1 M tetrabutylammonium hexafluorophosphate (*n*-

Bu<sub>4</sub>NPF<sub>6</sub>) as supporting electrolyte at room temperature by using a scan rate of 100 mV s<sup>-1</sup> and conventional three-electrode configuration consisting of a platinum working electrode with 2 mm diameter, a platinum wire counter electrode and a Ag/AgCl wire reference electrode. BTOIPC was calculated by using the density functional theory (DFT) with Gaussian 16. Ground state geometry optimization was performed using B3LYP exchange-correlation functional, the def2-SVP basis set and the density functional dispersion correction with Becke-Johnson damping.<sup>1</sup> Atomic force microscopy (AFM) images were obtained by using a SPM9700 microscope in the dynamic-model. Transmission electron microscopy (TEM) images of the active layers were obtained by using a JEOL JEM-1400 transmission electron microscope operated at 80 kV.

## Synthesis

*Synthesis of IPC:* To a 100 ml round-bottom flask, compound **1** (1.0 g, 6.85 mmol), compound **2** (0.74 g, 6.85 mmol) and acetic acid (30 ml) were added. The mixture were heated to reflux and stirred for 3h. After cooling to room temperature, the mixture was extracted with chloroform and washed with water for three times. The collected organic phase was evaporated and the residue was purified by column chromatography on silica gel using a mixture solvent as eluent (petroleum ether/dichloromethane, v/v = 1/1) to give a yellow solid (1.24 g, 83%). <sup>1</sup>H NMR (400 MHz, CDCl<sub>3</sub>), δ (ppm): 8.21 (d, *J* = 8 Hz, 1H), 7.68-7.75 (m, 2H), 7.60-7.64 (m, 1H), 4.18 (s, 2H). <sup>13</sup>C NMR (100 MHz, CDCl<sub>3</sub>), δ (ppm): 162.36, 157.29, 144.11, 135.34, 133.60, 129.35, 129.08, 126.04, 124.14, 113.90, 113.71, 36.33. HRMS *m/z*: [M+H]<sup>+</sup>

calcd. for  $C_{13}H_7N_4^+$ , 219.06652, found 219.06627.

*Synthesis of BTOIPC*: To a 100 ml round bottom flask, BTO-CHO (200 mg, 0.15 mmol) and IPC (200 mg, 0.9 mmol) were added under argon protection. Then, deoxidized chloroform (40 ml) was added and stirred for a while when piperidine (0.1 ml) was added. The mixture was kept stirring at 70°C for 16 h. After removal of chloroform of reaction mixture under reduced pressure, 100 ml methanol was added and the precipitate was collected by filtration. The residue was purified by column chromatography on silica gel using a mixture solvent as eluent (petroleum ether/dichloromethane, v/v = 1/1) to give a dark solid (104 mg, 40%).  $^1H$  NMR (400 MHz,  $CDCl_3$ ),  $\delta$  (ppm): 8.25 (s, 2H), 8.14 (d,  $J = 7.6$  Hz, 2H), 7.90 (s, 2H), 7.81 (d,  $J = 7.6$  Hz, 2H), 7.60-7.65 (m, 2H), 7.49 (t,  $J = 7.6$  Hz, 2H), 7.40-7.43 (m, 8H), 7.09-7.13 (m, 8H), 3.57 (s, 4H), 2.56 (t,  $J = 7.2$  Hz, 8H), 1.56-1.60 (m, 10H), 1.25-1.37 (m, 40H), 0.83-0.89 (m, 32H).  $^{13}C$  NMR (100 MHz,  $CDCl_3$ ),  $\delta$  (ppm): 155.16, 154.22, 153.44, 150.24, 145.83, 142.64, 142.09, 141.94, 138.25, 136.34, 135.23, 133.99, 132.88, 131.00, 130.04, 128.53, 128.30, 128.09, 128.00, 123.65, 121.27, 119.39, 114.60, 114.45, 63.89, 35.57, 31.71, 31.27, 31.23, 29.23, 23.43, 22.84, 22.71, 22.59, 14.27, 14.15, 14.10, 10.98, 10.88. MALDI-TOF-MS m/z: [M] calcd. for  $C_{112}H_{114}N_8O_2S_4$ , 1730.79, found 1730.88.

### **Photovoltaic devices fabrication and characterization**

The OSCs were fabricated with an conventional device configuration of

ITO/PEDOT:PSS/PBDB-T:BTOIPC/PDIN/Al. The patterned ITO-coated glass was scrubbed by detergent and then cleaned inside an ultrasonic bath by using deionized water, acetone, and isopropyl alcohol sequentially. Then, the ITO substrates was fast dried by using high pure nitrogen gas and then treated by oxygen plasma for 1 min to improve its work function and clearance. A thin PEDOT: PSS (Heraeus Clevios P VP A 4083) layer with a thickness of about 40 nm was spin-cast onto the ITO substrates at 4000 rpm for 40 s, and then dried at 150 °C for 10 min in air. The PEDOT:PSS coated ITO was transferred to a N<sub>2</sub> filled glove-box for further processing. The 1:1 weight ratio of donor (PBDB-T) and small molecular acceptor (BTOIPC) were dissolved in chlorobenzene (CB) to form a solution concentration of 18 mg/ml with 0.8% 1,8-diiodoctane (DIO) additive. The best-performance device was fabricated by spin-coating the mixture at 2000 rpm for 1 min and controlled the active layer thickness of ~100 nm measured by Ambios Technology XP-2 stylus Profiler. Subsequently, the active layer coated substrates were quickly transferred to a glove-box integrated thermal evaporator for PDIN and Al deposition. PDIN and Al layers were subsequently evaporated onto the active layer through a shadow mask at a vacuum pressure of  $\approx 10^{-4}$  Pa to form top electrode. The active area of cells is about 3.8 mm<sup>2</sup>, which is defined by the vertical overlap of ITO cathode and Al anode. The current-voltage (*J-V*) characteristic curves of all devices were measured by using a Keithley 2400 Source Meter in a high-purity nitrogen-filled glove box. AM 1.5G irradiation at 100 mW/cm<sup>2</sup> provided by a XES-40S2 (SAN-EI Electric Co., Ltd.) solar simulator (AAA grade, 70×70 mm<sup>2</sup> photobeam size), which was calibrated by

standard silicon solar cells (purchased from Zolix INSTRUMENTS CO. LTD). The external quantum efficiency (EQE) spectra of all devices were measured in air conditions by a Zolix Solar Cell Scan 100.

### **SCLC measurements**

The electron-only SCLC devices were a stack of ITO/ZnO/PBDB-T:BTOIPC/PFN/Al, and the hole-only devices were a stack of ITO/PEDOT:PSS/PBDB-T:BTOIPC/MoO<sub>x</sub>/Ag. The electron-only and hole-only SCLC devices fabrication processing methods are same with those for solar cell. The charge carrier mobility was determined by fitting the dark current to the model of a single carrier SCLC according to the equation:

$$J = \frac{9\varepsilon_0\varepsilon_r\mu V^2}{8L^3}$$

where  $J$  is the current density,  $L$  is the film thickness of the active layer,  $\mu$  is the charge carrier mobility,  $\varepsilon_r$  is the relative dielectric constant of the transport medium, and  $\varepsilon_0$  is the permittivity of free space.  $V = V_{\text{app}} - V_{\text{bi}}$ , where  $V_{\text{app}}$  is the applied voltage,  $V_{\text{bi}}$  is the offset voltage. The carrier mobility can be calculated from the slope of the  $J^{1/2} \sim V$  curves.

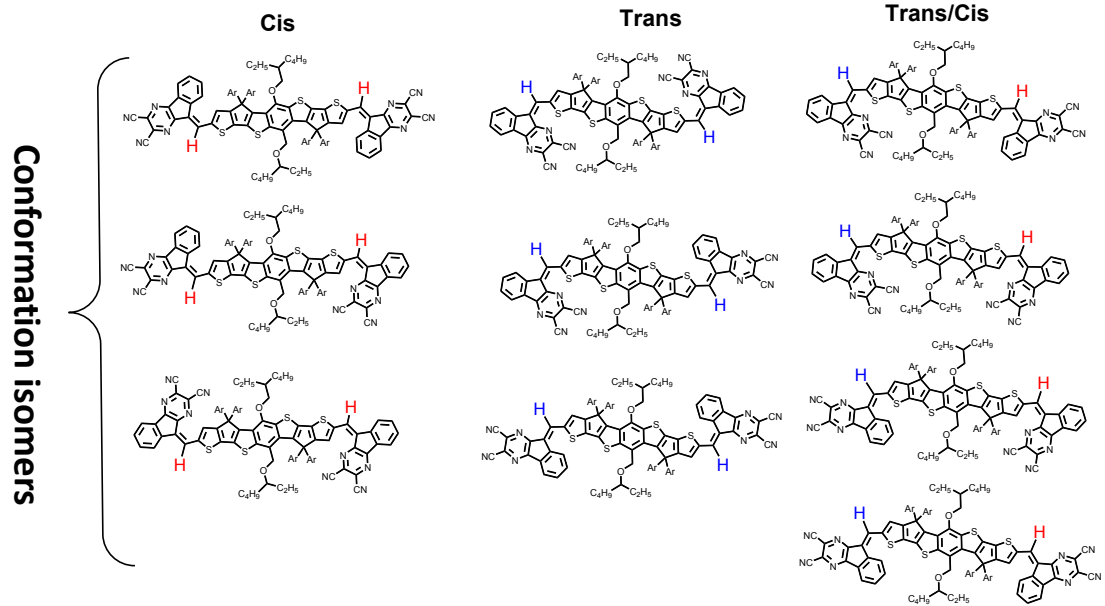

**Fig. S1.** The possible Cis-/Trans- isomers and conformation isomers of BTOIPC (the red is the Cis hydrogen and the blue is the Trans hydrogen).

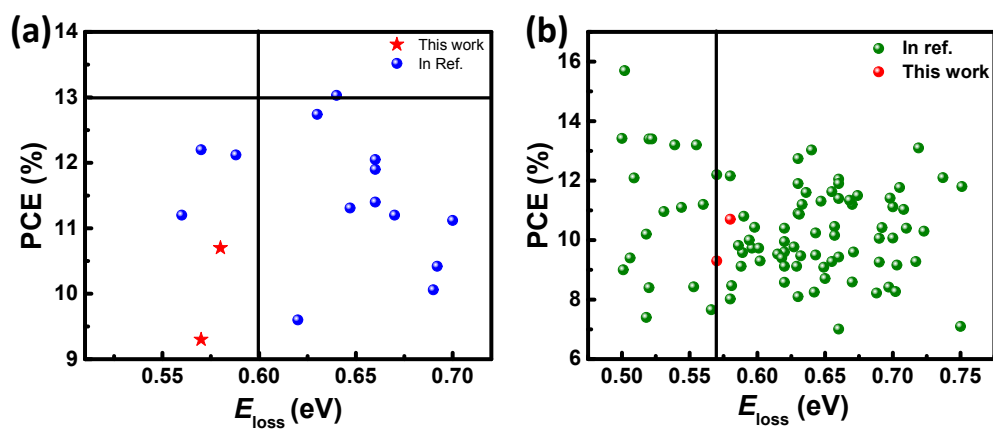

**Fig. S2.** The scatterplot of PCE *versus*  $E_{\text{loss}}$ : a) with PBDB-T as donor; b) with different donor.

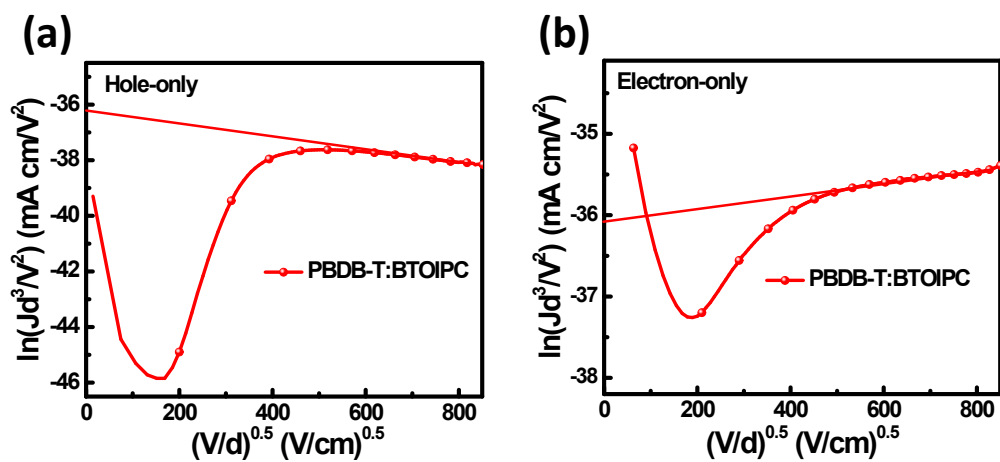

**Fig. S3.** a) The curve for hole-only device. b) The curve for electron-only device.

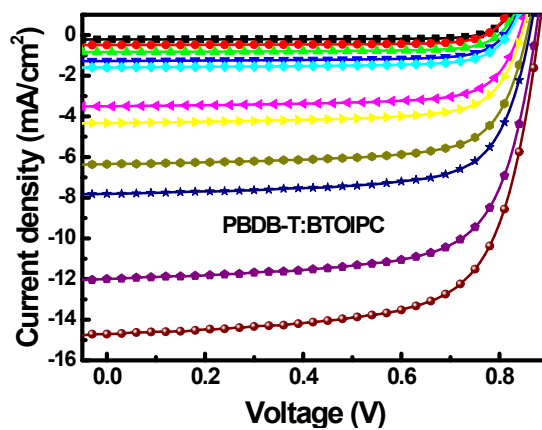

**Fig. S4.** The  $J$ - $V$  curves of PBDB-T:BTOIPC-based OSCs under different light intensity.

**Table S1** The detailed photovoltaic parameters of the 10 samples for OSCs based on PBDB-T:BTOIPC.

| PBDB-T:BTOIPC | $V_{oc}$ (V) | $J_{sc}$ (mA cm <sup>-2</sup> ) | FF (%) | PCE (%) |
|---------------|--------------|---------------------------------|--------|---------|
| 1             | 0.89         | 14.42                           | 69.95  | 8.98    |
| 2             | 0.89         | 14.46                           | 68.43  | 8.81    |
| 3             | 0.88         | 14.08                           | 70.37  | 8.72    |
| 4             | 0.88         | 13.93                           | 69.82  | 8.56    |
| 5             | 0.89         | 15.08                           | 69.02  | 9.27    |
| 6             | 0.89         | 15.16                           | 68.79  | 9.28    |
| 7             | 0.88         | 15.24                           | 69.45  | 9.31    |
| 8             | 0.88         | 15.22                           | 69.28  | 9.28    |
| 9             | 0.89         | 14.42                           | 69.95  | 8.98    |
| 10            | 0.89         | 14.46                           | 68.43  | 8.81    |

**Table S2** The summarized data of  $E_{loss}$  and PCE of reported OSCs.

| Acceptors | Donor      | $V_{oc}$<br>(V) | $J_{sc}$<br>(mA cm <sup>-2</sup> ) | $E_{loss}^a)$<br>(eV) | PCE<br>(%) | Refs. |
|-----------|------------|-----------------|------------------------------------|-----------------------|------------|-------|
| BTOIC     | PBDB-T     | 0.862           | 18.60                              | 0.531                 | 10.96      | 1     |
| IHIC      | PTB7-Th    | 0.754           | 19.01                              | 0.627                 | 9.77       | 2     |
| F6IC      | PTB7-Th    | 0.611           | 18.07                              | 0.750                 | 7.1        | 3     |
| F8IC      | PTB7-Th    | 0.640           | 25.12                              | 0.630                 | 10.9       | 3     |
| F10IC     | PTB7-Th    | 0.732           | 20.83                              | 0.518                 | 10.2       | 3     |
| 4TIC      | PTB7-Th    | 0.78            | 18.8                               | 0.598                 | 10.43      | 4     |
| SN6IC-4F  | PBDB-T     | 0.78            | 23.2                               | 0.539                 | 13.2       | 4     |
| IEICO     | PBDTTT-E-T | 0.82            | 17.7                               | 0.52                  | 8.4        | 5     |
| ATT-2     | PTB7-Th    | 0.73            | 20.75                              | 0.589                 | 9.58       | 6     |
| BT-CIC    | PCE-10     | 0.70            | 22.5                               | 0.633                 | 11.2       | 7     |
| DTPC-IC   | PTB7-Th    | 0.76            | 21.92                              | 0.454                 | 10.21      | 8     |
| CO8DFIC   | PTB7-Th    | 0.68            | 26.12                              | 0.580                 | 12.16      | 9     |
| R12-4Cl   | PBDB-T     | 0.75            | 18.5                               | 0.602                 | 9.3        | 10    |
| Y6        | PM6        | 0.83            | 25.3                               | 0.502                 | 15.7       | 11    |
| Y1        | PBDB-T     | 0.87            | 22.44                              | 0.500                 | 13.42      | 12    |
| Y2        | PBDB-T     | 0.82            | 23.56                              | 0.520                 | 13.40      | 12    |
| ACS8      | PTB7-Th    | 0.75            | 25.3                               | 0.555                 | 13.2       | 13    |
| T1        | PTB7-Th    | 0.72            | 20.95                              | 0.586                 | 9.82       | 14    |
| T2        | PTB7-Th    | 0.65            | 24.85                              | 0.631                 | 10.87      | 14    |
| T3        | PTB7-Th    | 0.61            | 22.00                              | 0.660                 | 9.43       | 14    |
| T4        | PTB7-Th    | 0.61            | 18.57                              | 0.660                 | 7.01       | 14    |
| IEICO-4F  | J52        | 0.734           | 21.9                               | 0.506                 | 9.4        | 15    |



|            |             |       |       |       |       |    |
|------------|-------------|-------|-------|-------|-------|----|
| IPIC-4F    | PBDB-T      | 0.835 | 19.8  | 0.544 | 11.1  | 16 |
| IPIC-4CI   | PBDB-T      | 0.813 | 22.2  | 0.522 | 13.4  | 16 |
| CPDT-4F    | PBDB-T      | 0.68  | 20.1  | 0.632 | 9.47  | 17 |
| CPDT-4CI   | PBDB-T      | 0.65  | 21.3  | 0.655 | 9.28  | 17 |
| SIOTIC-4F  | PTB7-Th     | 0.65  | 21.6  | 0.501 | 9.0   | 18 |
| COTIC-4F   | PTB7-Th     | 0.56  | 20.3  | 0.518 | 7.4   | 18 |
| CO5DFIC-OT | PTB7-Th     | 0.71  | 17.58 | 0.566 | 7.66  | 19 |
| CO5DFIC-ST | PTB7-Th     | 0.74  | 20.71 | 0.596 | 9.73  | 19 |
| CO6IC      | FTAZ        | 0.82  | 17.45 | 0.553 | 8.43  | 20 |
| CO6FIC     | FTAZ        | 0.75  | 19.38 | 0.588 | 9.12  | 20 |
| CO6DFIC    | FTAZ        | 0.67  | 20.98 | 0.642 | 8.25  | 20 |
| T6Me       | PM6         | 0.87  | 21.33 | 0.509 | 12.09 | 21 |
| BDTIT-M    | PBDB-T      | 1.53  | 0.942 | 0.588 | 12.12 | 22 |
| BDTThIT-M  | PBDB-T      | 1.55  | 0.903 | 0.647 | 11.31 | 22 |
| NITI       | PBDB-T      | 1.49  | 0.86  | 0.63  | 12.74 | 23 |
| IT-M       | PBDBT       | 1.60  | 0.94  | 0.66  | 12.05 | 24 |
| IT-OM-2    | PBDB-T      | 1.59  | 0.93  | 0.66  | 11.9  | 25 |
| ITCC       | PBDB-T      | 1.67  | 1.01  | 0.66  | 11.4  | 26 |
| ITIC       | PBDB-T      | 1.57  | 0.90  | 0.67  | 11.2  | 27 |
| FTIC-C6C8  | PBDB-T      | 1.63  | 0.93  | 0.70  | 11.12 | 28 |
| NFBTD      | PBDB-T      | 1.56  | 0.868 | 0.692 | 10.42 | 29 |
| FDICTF     | PBDB-T      | 1.63  | 0.94  | 0.69  | 10.06 | 30 |
| IDT-BOC6   | PBDB-T      | 1.63  | 1.01  | 0.62  | 9.6   | 31 |
| ZITI       | PBDB-T      | 1.53  | 0.89  | 0.64  | 13.03 | 32 |
| IXIC-2CI   | PBDB-T      | 1.30  | 0.73  | 0.57  | 12.2  | 33 |
| IXIC-4CI   | PBDB-T      | 1.25  | 0.69  | 0.56  | 11.2  | 33 |
| IT-4F      | PBDB-T-SF   | 0.88  | 0.64  | 0.719 | 13.10 | 34 |
| ITIC-Th1   | FTAZ        | 0.849 | 0.701 | 0.737 | 12.10 | 35 |
| IT-M       | PB3T        | 1.00  | 0.61  | 0.630 | 11.9  | 36 |
| ITCPTC     | PBT1-EH     | 0.95  | 0.63  | 0.751 | 11.8  | 37 |
| m-ITIC     | J61         | 0.912 | 0.668 | 0.705 | 11.77 | 38 |
| m-ITIC     | J91         | 0.984 | 0.61  | 0.655 | 11.63 | 39 |
| O-IDTBR    | PvBDTTAZ    | 1.08  | 0.55  | 0.636 | 11.6  | 40 |
| INIC3      | FTAZ        | 0.852 | 0.628 | 0.674 | 11.5  | 41 |
| ITIC       | J71         | 0.94  | 0.65  | 0.698 | 11.41 | 42 |
| ITIC       | PBQ-4F:     | 0.95  | 0.62  | 0.668 | 11.34 | 43 |
| IDIC       | PTFBDT-BZS: | 0.905 | 0.715 | 0.708 | 11.03 | 44 |
| ITIC       | PBPD-Th     | 1.01  | 0.54  | 0.590 | 10.8  | 45 |
| BT-IC      | J71         | 0.90  | 0.53  | 0.657 | 10.46 | 46 |
| ITTC       | HFQx        | 0.88  | 0.73  | 0.710 | 10.4  | 47 |
| ITIC       | PFBZ        | 0.89  | 0.68  | 0.620 | 10.4  | 48 |
| ITIC       | PTZ6        | 1.01  | 0.58  | 0.723 | 10.3  | 49 |
| ITIC       | PTzBI       | 0.87  | 0.70  | 0.643 | 10.24 | 50 |
| ITIC       | PDCBT       | 0.94  | 0.63  | 0.657 | 10.16 | 51 |

|               |               |             |             |             |             |                  |
|---------------|---------------|-------------|-------------|-------------|-------------|------------------|
| ATT-1         | PTB7-Th       | 0.87        | 0.67        | 0.700       | 10.07       | 52               |
| IEICO-4F      | PBDTTT-EFT    | 0.739       | 0.501       | 0.594       | 10.0        | 53               |
| IDTBR         | PffBT4T-2DT   | 1.07        | 0.56        | 0.620       | 9.95        | 54               |
| ITIC          | 3MT-Th        | 0.95        | 0.62        | 0.601       | 9.73        | 55               |
| ITIC-Th       | PDBT-T1       | 0.88        | 0.72        | 0.671       | 9.6         | 56               |
| ITIC          | J61           | 0.89        | 0.68        | 0.615       | 9.53        | 57               |
| SF-PDI2       | P3TEA         | 1.11        | 0.61        | 0.643       | 9.5         | 58               |
| ITIC-Th       | PffBT4T-B     | 0.972       | 0.628       | 0.618       | 9.4         | 59               |
| TPH-Se        | PDBT-T1       | 1.0         | 0.78        | 0.717       | 9.28        | 60               |
| ITIC          | J51           | 0.82        | 0.75        | 0.690       | 9.26        | 61               |
| N2200         | PTzBI         | 0.844       | 0.596       | 0.703       | 9.16        | 62               |
| ITTIC         | PBDB-T1       | 0.92        | 0.54        | 0.620       | 9.12        | 63               |
| ITIC          | PffQx-PS      | 0.97        | 0.60        | 0.629       | 9.12        | 64               |
| ITIC          | PBDTS-DTBTO   | 0.843       | 0.727       | 0.649       | 9.09        | 65               |
| IDIC          | PDBT-T1       | 0.89        | 0.73        | 0.650       | 8.71        | 66               |
| NDP-V         | PTB7-Th       | 0.74        | 0.87        | 0.670       | 8.59        | 67               |
| IDSe-T-IC     | J51           | 0.91        | 0.61        | 0.620       | 8.58        | 68               |
| TPB           | PTB7-Th       | 0.79        | 0.82        | 0.581       | 8.47        | 69               |
| SdiPBI-Se     | PDBT-T1       | 0.96        | 0.81        | 0.697       | 8.42        | 70               |
| N2200         | J51           | 0.83        | 0.65        | 0.702       | 8.27        | 71               |
| SdiPBI-S      | PBDTS-Se      | 0.91        | 0.86        | 0.688       | 8.22        | 72               |
| DBFI-EDOT     | PSEHTT        | 0.93        | 0.84        | 0.630       | 8.10        | 73               |
| IDTIDSe-T-IC  | J51           | 0.91        | 0.61        | 0.580       | 8.02        | 74               |
| <b>BTOIPC</b> | <b>PBDB-T</b> | <b>1.45</b> | <b>0.88</b> | <b>0.57</b> | <b>9.3</b>  | <b>This work</b> |
| <b>BT-IC</b>  | <b>PBDB-T</b> | <b>1.43</b> | <b>0.85</b> | <b>0.58</b> | <b>10.7</b> | <b>This work</b> |

a) Estimated from absorption edge according to  $E_g^{\text{opt}} = 1240/\lambda_{\text{onset}}$ .

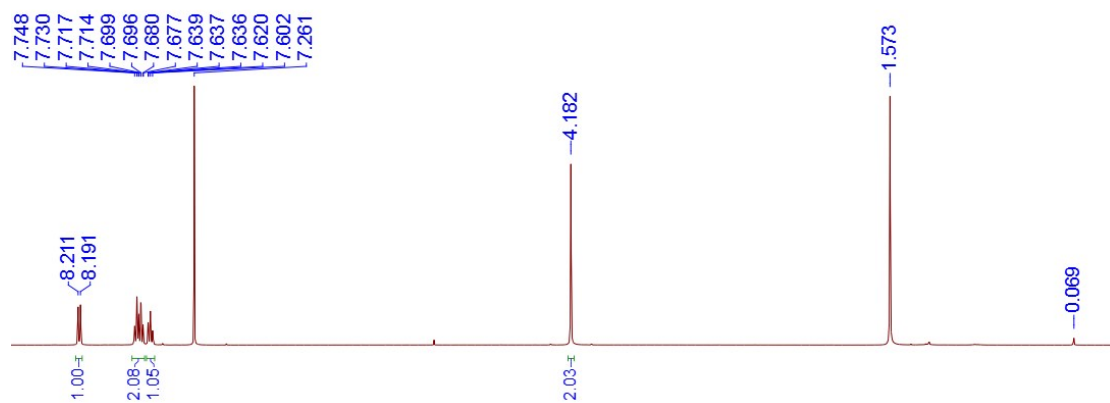

**Fig. S5.** The <sup>1</sup>H NMR spectrum of IPC.

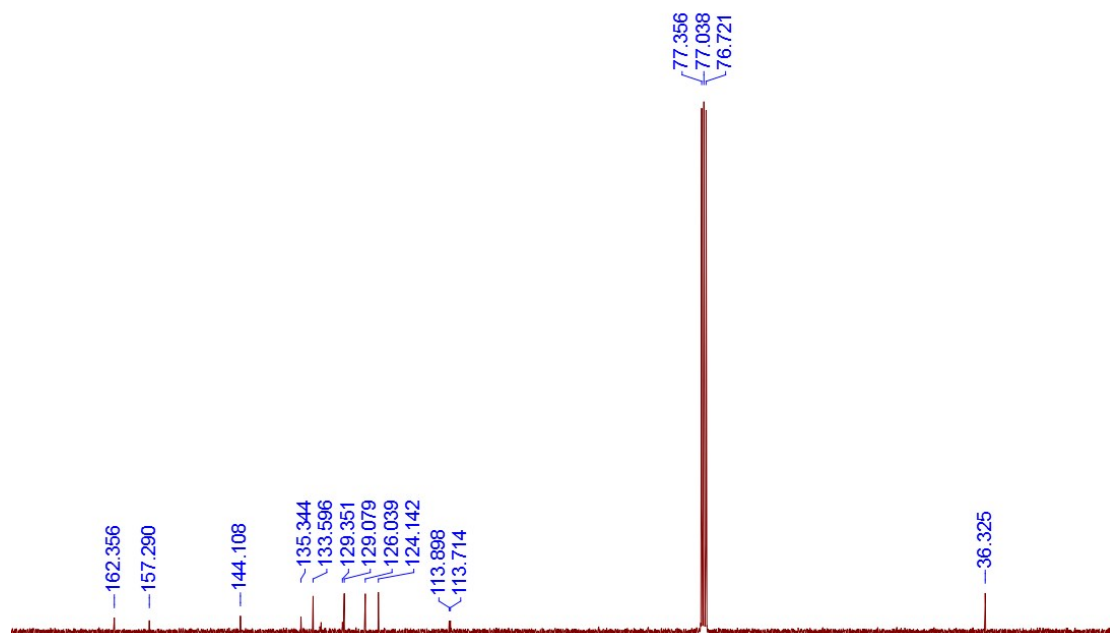

**Fig. S6.** The <sup>13</sup>C NMR spectrum of IPC.

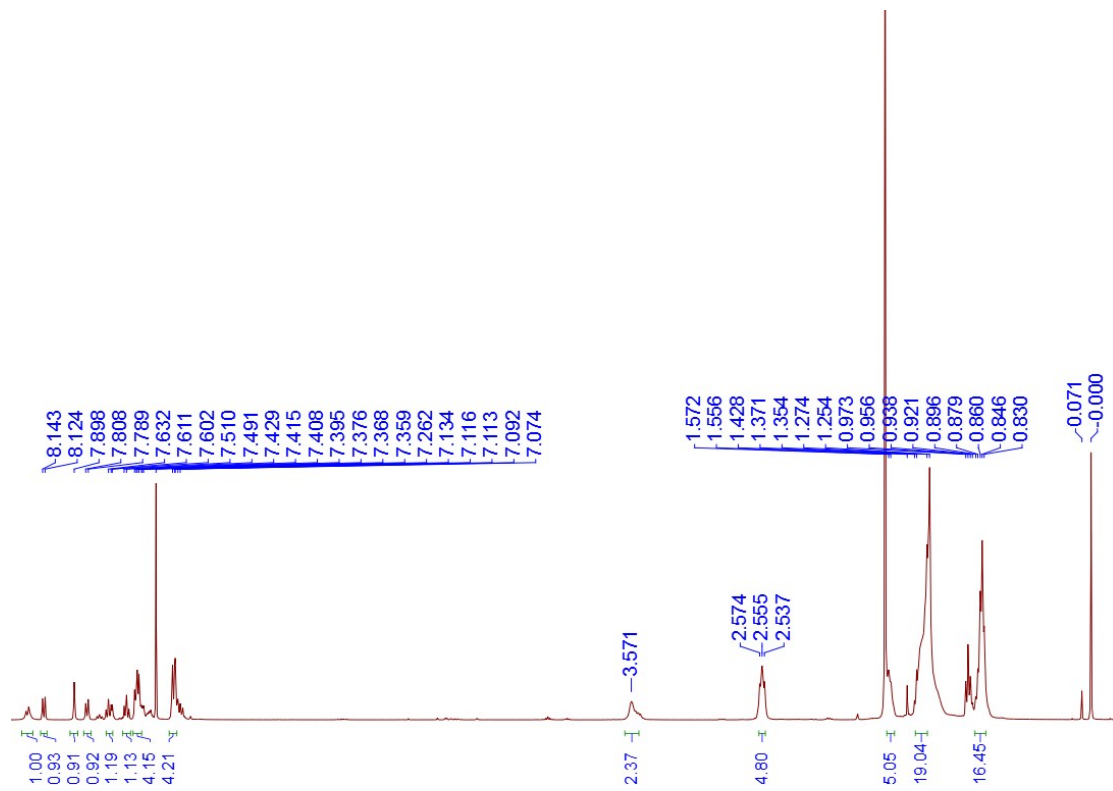

**Fig. S7.** The  $^1\text{H}$  NMR spectrum of BTOIPC.

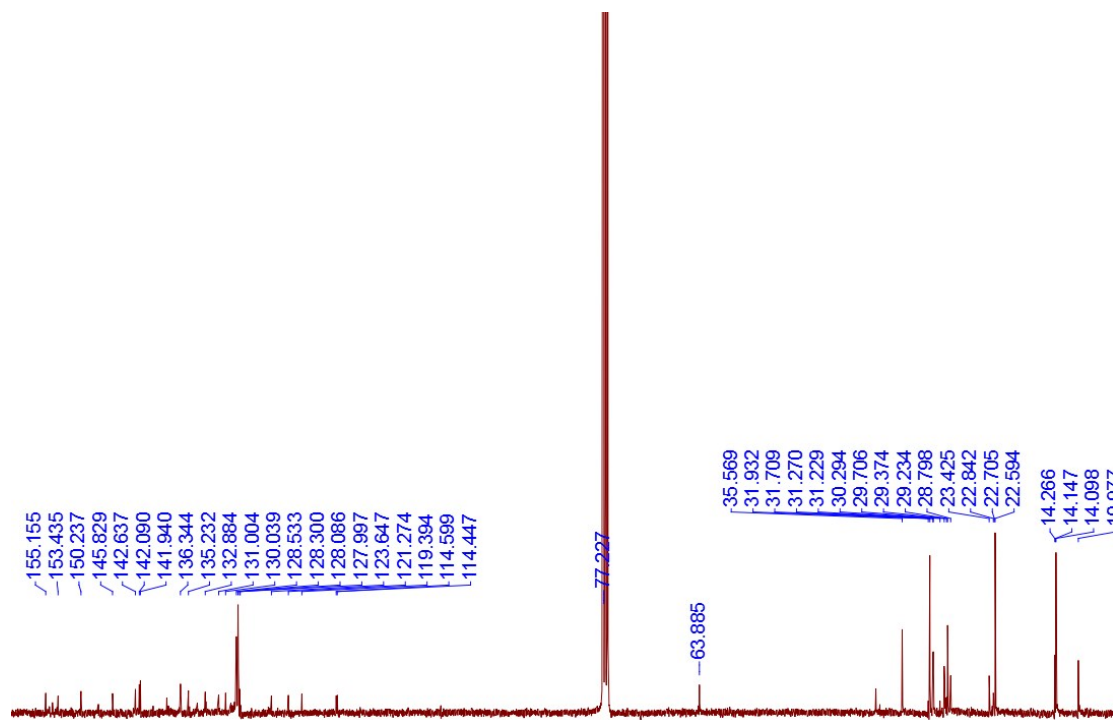

**Fig. S8.** The  $^{13}\text{C}$  NMR spectrum of BTOIPC.

## References

- [1] W. Gao, T. Liu, R. Ming, Z. Luo, K. Wu, L. Zhang, J. Xin, D. Xie, G. Zhang, W. Ma, H. Yan, C. Yang, *Adv. Funct. Mater.* **2018**, *28*, 1803128.
- [2] W. Wang, C. Yan, T.-K. Lau, J. Wang, K. Liu, Y. Fan, X. Lu, X. Zhan, *Adv. Mater.* **2017**, *29*, 1701308.
- [3] S. Dai, T. Li, W. Wang, Y. Xiao, T.-K. Lau, Z. Li, K. Liu, X. Lu, X. Zhan, *Adv. Mater.* **2018**, *30*, 1706571.
- [4] X. Shi, L. Zuo, S. B. Jo, K. Gao, F. Lin, F. Liu, A. K.-Y. Jen, *Chem. Mater.* **2017**, *29*, 8369.
- [5] H. Yao, Y. Chen, Y. Qin, R. Yu, Y. Cui, B. Yang, S. Li, K. Zhang, J. Hou, *Adv. Mater.* **2016**, *28*, 8283.
- [6] F. Liu, Z. Zhou, C. Zhang, J. Zhang, Q. Hu, T. Vergote, F. Liu, T. P. Russell, X. Zhu, *Adv. Mater.* **2017**, *29*, 1606574.
- [7] Y. Li, J.-D. Lin, X. Che, Y. Qu, F. Liu, L.-S. Liao, S. R. Forrest, *J. Am. Chem. Soc.* **2017**, *139*, 17114.
- [8] Z. Yao, X. Liao, K. Gao, F. Lin, X. Xu, X. Shi, L. Zuo, F. Liu, Y. Chen, A. K. Y. Jen, *J. Am. Chem. Soc.* **2018**, *140*, 2054.
- [9] Z. Xiao, X. Jia, L. Ding, *Sci. Bull.* **2017**, *62*, 1562.
- [10] J. Qu, Q. Zhao, J. Zhou, H. Lai, T. Liu, D. Li, W. Chen, Z. Xie, F. He, *Chem. Mater.* **2019**, *31*, 1664.
- [11] J. Yuan, Y. Zhang, L. Zhou, G. Zhang, H.-L. Yip, T.-K. Lau, X. Lu, C. Zhu, H. Peng, P. A. Johnson, M. Leclerc, Y. Cao, J. Ulanski, Y. Li, Y. Zou, *Joule*, **2019**, *3*, 1.
- [12] J. Yuan, T. Huang, P. Cheng, Y. Zou, H. Zhang, J. L. Yang, S.-Y. Chang, Z. Zhang, W. Huang, R. Wang, D. Meng, F. Gao, Y. Yang, *Nat. Commun.* **2019**, *10*, 570.
- [13] J. Chen, G. Li, Q. Zhu, X. Guo, Q. Fan, W. Ma, M. Zhang, *J. Mater. Chem. A* **2019**, *7*, 3745–3751.
- [14] F.-X. Chen, J.-Q. Xu, Z.-X. Liu, M. Chen, R. Xia, Y. Yang, T.-K. Lau, Y. Zhang, X. Lu, H.-L. Yip, A. K.-Y. Jen, H. Chen, C.-Z. Li, *Adv. Mater.* **2018**, *30*, 1803769.

- [15]. H. Yao, Y. Cui, R. Yu, B. Gao, H. Zhang, J. Hou, *Angew. Chem. Int. Ed.* **2017**, *56*, 3045–3049.
- [16]. R. Geng, X. Song, H. Feng, J. Yu, M. Zhang, N. Gasparini, Z. Zhang, F. Liu, D. Baran, W. Tang, *ACS Energy Lett.* **2019**, *4*, 763.
- [17]. K. Wang, J. Lv, T. Duan, Z. Li, Q. Yang, J. Fu, W. Meng, T. Xu, Z. Xiao, Z. Kan, K. Sun, S. Lu, *ACS Appl. Mater. Interfaces* **2019**, *11*, 6717.
- [18]. J. Lee, S.-J. Ko, M. Seifrid, H. Lee, B. R. Luginbuhl, A. Karki, M. Ford, K. Rosenthal, K. Cho, T.-Q. Nguyen, G. C. Bazan, *Adv. Energy Mater.* **2018**, *8*, 1801212.
- [19] L. Zhang, K. Jin, Z. Xiao, X. Wang, T. Wang, C. Yi, L. Ding, *Mater. Chem. Front.* **2019**, *3*, 492-495.
- [20]. T. Li, H. Zhang, Z. Xiao, J. J. Rech, H. Niu, W. You, L. Ding, *Mater. Chem. Front.* **2018**, *2*, 700.
- [21] R. Ming, J. Wang, W. Gao, M. Zhang, J. Gao, W. Ning, Z. Luo, X. Liu, C. Zhong, F. Zhang, C. Yang, *Small Methods* **2019**, *3*, 1900280.
- [22] Q. An, W. Gao, F. Zhang, J. Wang, M. Zhang, K. Wu, X. Ma, Z. Hu, C. Jiao and C. Yang, *J. Mater. Chem. A* **2018**, *6*, 2468.
- [23] Z. Zhou, W. Liu, Z. Zhang, F. Liu, H. Yan and X. Zhu, *Adv. Mater.* **2017**, *29*, 1704510.
- [24] S. Li, L. Ye, W. Zhao, S. Zhang, S. Mukherjee, H. Ade and J. Hou, *Adv. Mater.* **2016**, *28*, 9423.
- [25] S. Li, L. Ye, W. Zhao, S. Zhang, H. Ade and J. Hou, *Adv. Energy Mater.* **2017**, *7*, 1700183.
- [27] W. Zhao, D. Qian, S. Zhang, S. Li, O. Inganäs, F. Gao and J. Hou, *Adv. Mater.* **2016**, *28*, 4734.
- [28] Z. Zhang, M. Li, Y. Liu, J. Zhang, S. Feng, X. Xu, J. Song and Z. Bo, *J. Mater. Chem. A* **2017**, *5*, 7776.
- [29] B. Kan, H. Feng, X. Wan, F. Liu, X. Ke, Y. Wang, Y. Wang, H. Zhang, C. Li, J. Hou and Y. Shen, *J. Am. Chem. Soc.* **2017**, *139*, 4929.
- [30] N. Qiu, H. Zhang, X. Wan, C. Li, X. Ke, H. Feng, B. Kan, H. Zhang, Q. Zhang, Y. Lu and Y. Chen, *Adv. Mater.* **2017**, *29*, 1604964.

- [31] Y. Liu, Z. Zhang, S. Feng, M. Li, L. Wu, R. Hou, X. Xu, X. Chen and Z. Bo, *J. Am. Chem. Soc.* **2017**, 139, 3356.
- [32] W. Liu, J. Zhang, Z. Zhou, D. Zhang, Y. Zhang, S. Xu and X. Zhu, *Adv. Mater.* **2018**, 30, 1800403.
- [33] Y. Chen, T. Liu, H. Hu, T. Ma, J. Y. L. Lai, J. Zhang, H. Ade and H. Yan, *Adv. Energy Mater.* **2018**, 8, 1801203.
- [34] W. Zhao, S. Li, H. Yao, S. Zhang, Y. Zhang, B. Yang, J. Hou, *J. Am. Chem. Soc.* **2017**, 139, 7148.
- [35] F. Zhao, S. Dai, Y. Wu, Q. Zhang, J. Wang, L. Jiang, Q. Ling, Z. Wei, W. Ma, W. You, C. Wang, X. Zhan, *Adv. Mater.* **2017**, 29, 1700144.
- [36] D. Liu, B. Yang, B. Jang, B. Xu, S. Zhang, C. He, H.Y. Woo, J. Hou, *Energy Environ. Sci.* **2017**, 10, 546.
- [37] D. Xie, T. Liu, W. Gao, C. Zhong, L. Huo, Z. Luo, K. Wu, W. Xiong, F. Liu, Y. Sun, C. Yang, *Sol. RRL* **2017**, 1, 1700044.
- [38] Y. Yang, Z.-G. Zhang, H. Bin, S. Chen, L. Gao, L. Xue, C. Yang, Y.F. Li, *J. Am. Chem. Soc.* **2016**, 138, 15011.
- [39] L. Xue, Y. Yang, J. Xu, C. Zhang, H. Bin, Z. Zhang, B. Qiu, X. Li, C. Sun, L. Gao, J. Yao, X. Chen, Y. Yang, M. Xiao, Y. Li, *Adv. Mater.* **2017**, 1703344.
- [40] J. Liu, S. Chen, D. Qian, B. Gautam, G. Yang, J. Zhao, J. Bergqvist, F. Zhang, W. Ma, H. Ade, O. Inganäs, K. Gundogdu, F. Gao, H. Yan, *Nat. Energy* **2016**, 1, 16089.
- [41] S. Dai, F. Zhao, Q. Zhang, T.-K. Lau, T. Li, K. Liu, Q. Ling, C. Wang, X. Lu, W. You, X. Zhan, *J. Am. Chem. Soc.* **2017**, 139, 1336
- [42] H. Bin, L. Gao, Z.-G. Zhang, Y. Yang, Y. Zhang, C. Zhang, S. Chen, L. Xue, C. Yang, M. Xiao, Y. F. Li, *Nat. Commun.* **2016**, 7, 13651.
- [43] Z. Zheng, O.M. Awartani, B. Gautam, D. Liu, Y. Qin, W. Li, A. Bataller, K. Gundogdu, H. Ade, J. Hou, *Adv. Mater.* **2017**, 29, 1604241.
- [44] Y. Lin, F. Zhao, Y. Wu, K. Chen, Y. Xia, G. Li, S.K.K. Prasad, J. Zhu, L. Huo, H. Bin, Z.-G. Zhang, X. Guo, M. Zhang, Y. Sun, F. Gao, Z. Wei, W. Ma, C. Wang, J. Hodgkiss, Z. Bo, O. Inganäs, Y.F. Li, X. Zhan, *Adv. Mater.* **2017**, 29, 1604964.
- [45] Q. Fan, Z. Xu, X. Guo, X. Meng, W. Li, W. Su, X. Ou, W. Ma, M. Zhang, Y. Li,

*Nano Energy*. **2017**, 40, 20.

[46] Y. Li, L. Zhong, B. Gautam, H.-J. Bin, J.-D. Lin, F.-P. Wu, Z. Zhang, Z.-Q. Jiang, Z.-G. Zhang, K. Gundogdu, Y. Li, L.-S. Liao, *Energy Environ. Sci.* **2017**, 10, 1610.

[47] Z. Zhang, L. Feng, S. Xu, J. Yuan, Z.-G. Zhang, H. Peng, Y. Li, Y. Zou, *J. Mater. Chem. A* **2017**, 5, 11286.

[48] Q. Fan, W. Su, X. Meng, X. Guo, G. Li, W. Ma, M. Zhang, Y. Li, *Sol. RRL* **2017**, 1, 1700020.

[49] B. Guo, W. Li, X. Guo, X. Meng, W. Ma, M. Zhang, Y. Li, *Nano Energy* **2017**, 34, 556.

[50] B. Fan, K. Zhang, X.-F. Jiang, L. Ying, F. Huang, Y. Cao, *Adv. Mater.* **2017**, 29, 1606396.

[51] Y. Qin, M.A. Uddin, Y. Chen, B. Jang, K. Zhao, Z. Zheng, R. Yu, T.J. Shin, H.Y. Woo, J. Hou, *Adv. Mater.* **2016**, 28, 9416.

[52] ] F. Liu, Z. Zhou, C. Zhang, T. Vergote, H. Fan, F. Liu, X. Zhu, *J. Am. Chem. Soc.* **2016**, 138, 15523.

[53] H. Yao, Y. Cui, R. Yu, B. Gao, H. Zhang, J. Hou, *Angew. Chem. Int. Ed.* **2017**, 56, 1.

[54] D. Baran, T. Kirchartz, S. Wheeler, S. Dimitrov, M. Abdelsamie, J. Gorman, R. Ashraf, S. Holliday, A. Wadsworth, N. Gasparini, P. Kaienburg, H. Yan, A. Amassian, C.J. Brabec, J.R. Durrant, I. McCulloch, *Energy Environ. Sci.* **2016**, 9, 3783.

[55] G.E. Park, S. Choi, S.Y. Park, D.H. Lee, M.J. Cho, D.H. Choi, *Adv. Energy Mater.* **2017**, 1700566.

[56] Y. Lin, F. Zhao, Q. He, L. Huo, Y. Wu, T.C. Parker, W. Ma, Y. Sun, C. Wang, D. Zhu, A.J. Heeger, S.R. Marder, X. Zhan, *J. Am. Chem. Soc.* **2016**, 138, 4955.

[57] H. Bin, Z.-G. Zhang, L. Gao, S. Chen, L. Zhong, L. Xue, C. Yang, Y. F. Li, *J. Am. Chem. Soc.* **2016**, 138, 4657.

[58] J. Liu, S. Chen, D. Qian, B. Gautam, G. Yang, J. Zhao, J. Bergqvist, F. Zhang, W. Ma, H. Ade, O. Inganäs, K. Gundogdu, F. Gao, H. Yan, *Nat. Energy* **2016**, 1, 16089.

[59] S. Chen, H. Yao, Z. Li, O.M. Awartani, Y. Liu, Z. Wang, G. Yang, J. Zhang, H. Ade, H. Yan, *Adv. Energy Mater.* **2017**, 1602304.



- [60] D. Meng, H. Fu, C. Xiao, X. Meng, T. Winands, W. Ma, W. Wei, B. Fan, L. Huo, N.L. Doltsinis, Y. Li, Y. Sun, Z. Wang, *J. Am. Chem. Soc.* **2016**, 138, 10184.
- [61] L. Gao, Z.-G. Zhang, H. Bin, L. Xue, Y. Yang, C. Wang, F. Liu, T.P. Russell, Y. Li, *Adv. Mater.* **2016**, 28, 8288.
- [62] B. Fan, Lei Ying, Z. Wang, B. He, X.-F. Jiang, F. Huang, Y. Cao, *Energy Environ. Sci.* **2017**, 10, 1243.
- [63] Z. Zhang, W. Liu, T. Rehman, H.-X. Ju, J. Mai, X. Lu, M. Shi, J. Zhu, C.-Z. Li, H. Chen, *J. Mater. Chem. A* **2017**, 5, 9649.
- [64] J. Yuan, L. Qiu, Z.-G. Zhang, Y. Li, Y. Chen, Y. Zou, *Nano Energy* 2016, 30, 312.
- [65] H. Yao, R. Yu, T.J. Shin, H. Zhang, S. Zhang, B. Jang, M.A. Uddin, H.Y. Woo, J. Hou, *Adv. Energy Mater.* **2016**, 6, 1600742.
- [66] Y. Lin, Q. He, F. Zhao, L. Huo, J. Mai, X. Lu, C.-J. Su, T. Li, J. Wang, J. Zhu, Y. Sun, C. Wang, X. Zhan, *J. Am. Chem. Soc.* **2016**, 138, 2973.
- [67] Y. Guo, Y. Li, O. Awartani, H. Han, J. Zhao, H. Ade, H. Yan, *Adv. Mater.* **2017**, 1700309.
- [68] Y. Li, L. Zhong, F.-P. Wu, Y. Yuan, H.-J. Bin, Z.-Q. Jiang, Z. Zhang, Z.-G. Zhang, Y.F. Li, L.-S. Liao, *Energy Environ. Sci.* **2016**, 9, 3429.
- [69] Q. Wu, D. Zhao, A.M. Schneider, W. Chen, L. Yu, *J. Am. Chem. Soc.* **2016**, 138, 7248.
- [70] D. Meng, D. Sun, C. Zhong, T. Liu, B. Fan, L. Huo, Y. Li, W. Jiang, H. Choi, T. Kim, J.Y. Kim, Y. Sun, Z. Wang, A.J. Heeger, *J. Am. Chem. Soc.* **2016**, 138, 375.
- [71] H. Yao, Y. Chen, Y. Qin, R. Yu, Y. Cui, B. Yang, S. Li, K. Zhang, J. Hou, *Adv. Mater.* **2016**, 28, 8283.
- [72] L. Gao, Z.-G. Zhang, L. Xue, J. Min, J. Zhang, Z. Wei, Y. Li, *Adv. Mater.* **2016**, 28, 1884.
- [73] Y. J. Hwang, H. Li, B.A.E. Courtright, S. Subramaniyan, S.A. Jenekhe, *Adv. Mater.* **2016**, 28, 124.
- [74] Y. Li, D. Qian, L. Zhong, J.-D. Lin, Z.-Q. Jiang, Z.-G. Zhang, Z. Zhang, Y.F. Li, L.-S. Liao, F. Zhang, *Nano Energy* **2016**, 27, 430.
